# Supplementary material for: Metal-Doped NASICON/Polymer Composite Solid Electrolyte for Lithium Titania Anode in Lithium-Ion Batteries
Source: MDPI journal article supplement (doi:10.3390/polym16091251), 2024-04-30
Supplement: s1 [file s1]

## Supplementary Information

### Metal-Doped NASICON/Polymer Composite Solid Electrolyte for Lithium Titania Anode of Li-ion Battery

Chien-Te Hsieh, Tzu-Shaing Cho, Jeng-Kuei Chang, Jagabandhu Patra

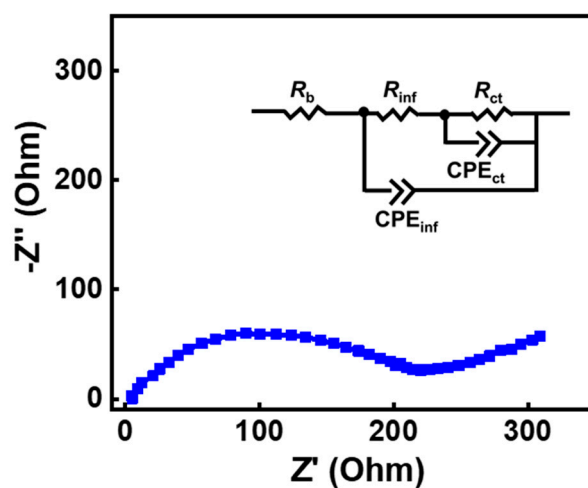

**Figure S1.** EIS data of Li||CSE (with 0-LATP)||LTO cell.

Note: The equivalent circuit used to fit the EIS data are shown in the figure inset. The  $R_b$ ,  $R_{inf}$ , and  $R_{ct}$  are bulk electrolyte resistance, electrolyte/electrode interfacial resistance, and charge-transfer resistance, respectively. The  $CPE_{inf}$  and  $CPE_{ct}$  are interfacial and charge-transfer constant-phase elements, respectively.
